# Supplementary material for: A mechanically strong and sensitive CNT/rGO–CNF carbon aerogel for piezoresistive sensors
Source: Royal Society of Chemistry journal article supplement (doi:10.1039/c8ta09322a), 2018-01-01
Supplement: c8ta09322a1.pdf [file c8ta09322a1.pdf]

## Electronic Supplementary Information for

### **Mechanically strong and sensitive CNT/rGO -CNF carbon aerogel for piezoresistive sensor**

Xinwen Peng, Kunze Wu, Yijie Hu, Hao Zhuo, Zehong Chen, Shuangshuang Jing, Qingzhong Liu, Chuanfu Liu, and Linxin Zhong\*

State Key Laboratory of Pulp and Paper Engineering, South China University of Technology, Guangzhou, P. R. China.

\*Corresponding authors. E-mail: lxzhong0611@scut.edu.cn (L. Zhong)

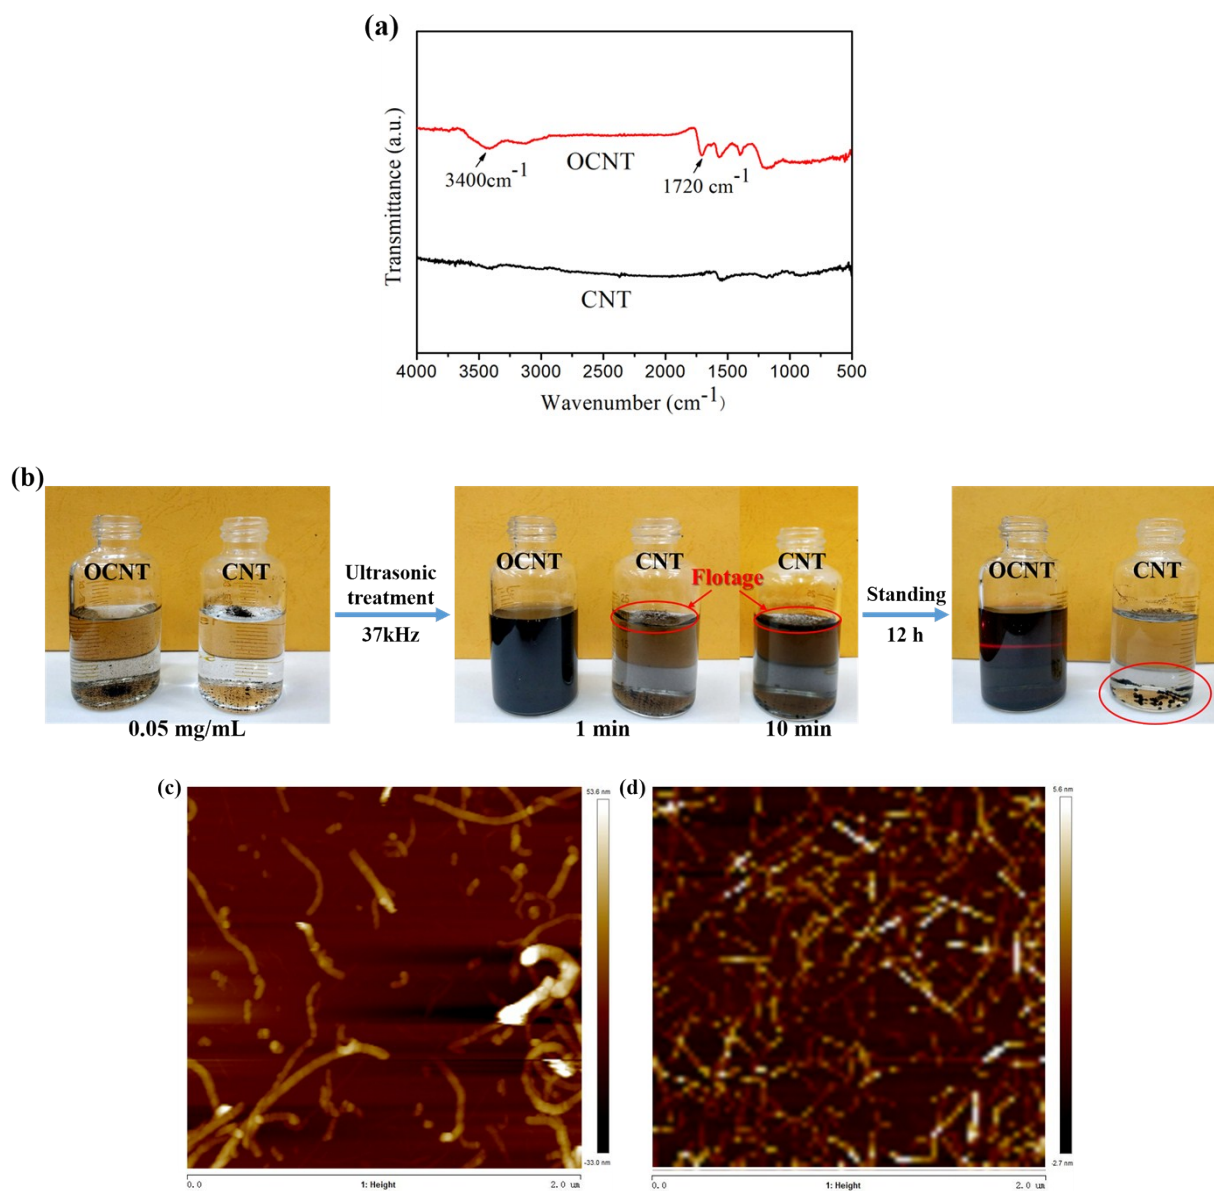

Fig. S1. (a) FTIR spectra of the pristine CNT and oxidized CNT (OCNT). (b) Digital photographs of

the dispersion of OCNT and CNT in water. AFM of (c) OCNT and (d) CNT.

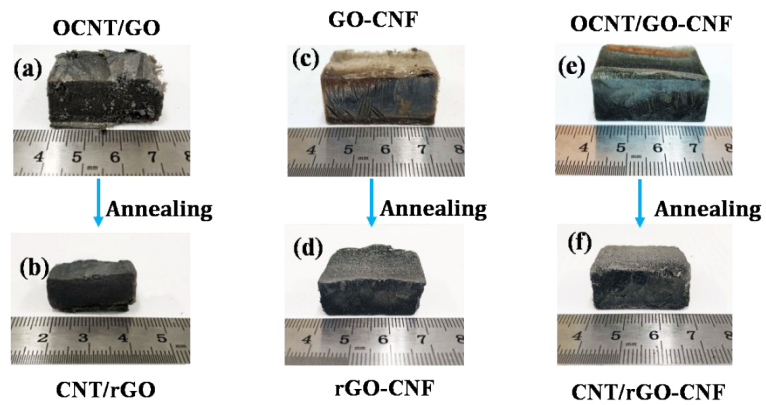

Fig. S2. Morphologies of the as-prepared aerogels before and after carbonization. (a) OCNT/GO aerogel, (b) CNT/rGO carbon aerogel, (c) GO-CNF aerogel, (d) rGO-CNF carbon aerogel aerogel, (e) OCNF/GO-CNF aerogel, and (d) CNF/rGO-CNF carbon aerogel.

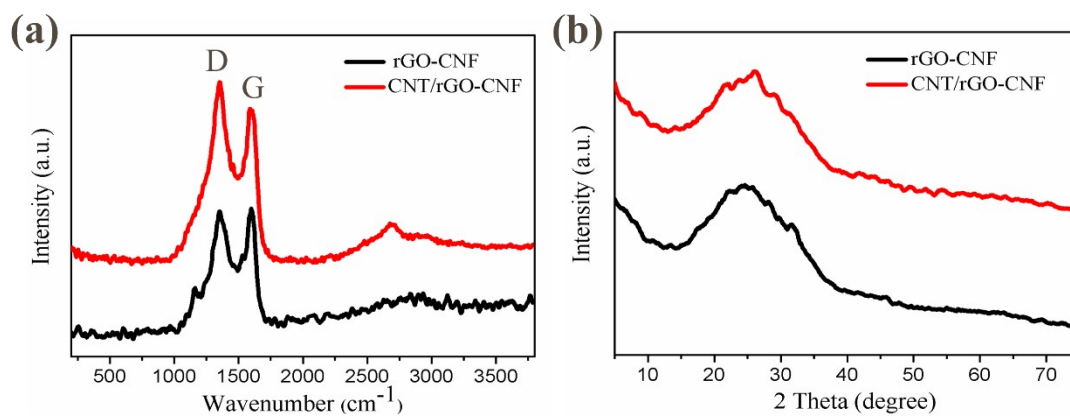

Fig. S3. Raman (a) and XRD spectra (b) of Rgo-CNF aerogel and CNT/rGO-CNF.
